# Supplementary material for: Enhancing organizational communication via intelligent voice assistant for knowledge workers: The role of perceived supervisor support, psychological capital, and employee wellbeing
Source: Frontiers journal article supplement (doi:10.3389/fcomm.2022.1084703), 2023-01-06
Supplement: Table_1.docx [file Table_1.docx]

**Questionnaire on the impact of the application of artificial intelligence voice assistant on the subjective well-being of knowledge workers**

Dear Mr/Miss:

Hello! Thank you very much for taking part in our survey. This questionnaire survey is anonymous, and the survey results are only used for research. Please read each sentence carefully, and then answer according to your actual situation. There is no right or wrong answer, please do not worry. This research promises that the survey data will be strictly confidential and will not be used in any commercial field. Thank you for your participation!

Wishing you all the best, good health, and a prosperous Year of the Tiger!

**Personal information-Section starts**

Q1. Your gender:


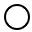
A. Male


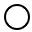
B. Female

Q2. Your age:


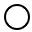
A. Under the age of 18


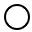
B. 18~24


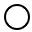
C. 25~30


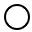
D. 31~40


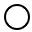
E. 41~50


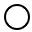
F. 51~60


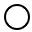
G. Above the age of 60

Q3. Your highest education (including current study):


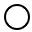
A. Junior high school and below


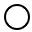
B. High school/technical secondary school/technical school


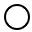
C. College


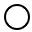
D. Undergraduate


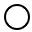
E. Master's degree and above

Q4. Type of jobs:


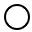
 State-owned enterprise


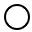
 Business unit


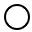
 Civil servant


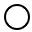
 Private Enterprise


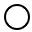
 Foreign companies


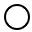
 Professionals (such as doctors/lawyer/teachers, etc.)


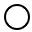
 Freelancers/self-employed


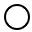
 Student


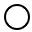
 Pending employment


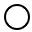
 Other

Q5. Your current position:


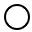
 General staff/non-manager


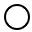
 Basic-level management/Junior Technician/Section level


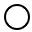
 Middle management/Intermediate Technician/Division level


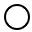
 Top management/Senior technical staff/Bureau level


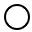
 Other

Q6. I have high professional quality.


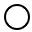
 strongly disagree


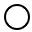
 rather disagree


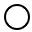
 a bit


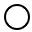
 uncertain


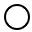
 somewhat agree


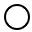
 relatively agree


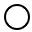
 Very much agree

Q7. I have a strong thirst for knowledge.


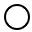
 strongly disagree


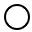
 rather disagree


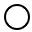
 a little disagree


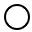
 uncertain


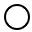
 somewhat agree


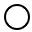
 relatively agree


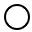
 Very much agree

Q8. Most of what I do is creative work, using my mind to think creatively.


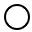
 strongly disagree


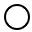
 rather disagree


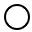
 a little disagree


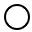
 uncertain


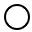
 somewhat agree


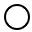
 relatively agree


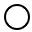
 Very much agree

Q9. Please select "strongly disagree" for this question:


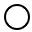
 strongly disagree


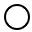
 rather disagree


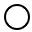
 a little disagree


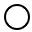
 uncertain


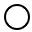
 somewhat agree


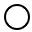
 relatively agree


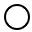
 Very much agree

Condition: “strongly disagree” Not selected, Jump to: automatic rejection

Q10. I am more interested in challenging, creative tasks and aspire to bring out the best of my talents through the process.


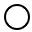
 strongly disagree


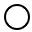
 rather disagree


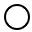
 a little disagree


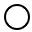
 uncertain


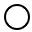
 somewhat agree


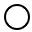
 relatively agree


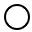
 Very much agree

Q11. I have a strong sense of autonomy at work and tend to have an unconstrained work environment and flexible hours.


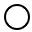
 strongly disagree


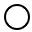
 rather disagree


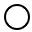
 a little disagree


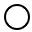
 uncertain


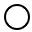
 somewhat agree


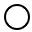
 relatively agree


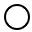
 Very much agree

Q12. I am highly mobile and tend to focus on personal development.


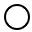
 strongly disagree


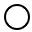
 rather disagree


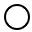
 a little disagree


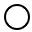
 uncertain


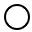
 somewhat agree


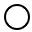
 relatively agree


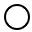
 Very much agree

Q13. Which smart voice assistants have you used: [Multiple choice]


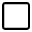
A. Xiaoyi (Huawei)


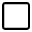
B. Bush(oppo)


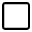
C. Tmall Genie


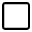
D. Xiao Ai (Xiaomi)/Red rice)


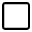
E. Bixby(Samsung)


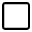
F. Jovi (vivo)


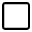
G. Siri(apple)


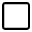
H. Others (please specify)


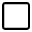
I. Have not used

Q14. How often do you use your smart voice assistant:


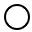
A. Never used


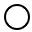
B. 1-3Second-rate/year


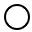
C. 1-3Second-rate/moon


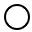
D. 1-3Second-rate/day


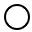
E. 3 times or more/day

Q15. Excuse me, how much does 100+100 equal to:


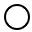
300


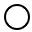
500


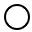
200


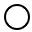
600

Condition: “200” Not selected, Jump to: automatic rejection

**‾ ‾ ‾ ‾ ‾ ‾ ‾ ‾ ‾ ‾ ‾ ‾ ‾ ‾ ‾ ‾ ‾ ‾ ‾ ‾ ‾ ‾ ‾ ‾ ‾ ‾ ‾ ‾ ‾ ‾‾ ‾ ‾ ‾ ‾ ‾ ‾ ‾ ‾ ‾ ‾ ‾ ‾ ‾ ‾ ‾ ‾ ‾ ‾ ‾ ‾ ‾ ‾ ‾ ‾ ‾ ‾ ‾ ‾ ‾ ‾ ‾ ‾ ‾ ‾**

**Personal information-Section ends**

**Priming Materials (Group 1)-Section starts**

**Next, please read the following materials carefully:**

Suppose your company has created an intelligent voice assistant named Xiaoyi for employees. In addition to basic functions such as note taking and search, it can also help you communicate quickly with your superiors online. Next, please imagine that you are working very hard to do your job today, but there are some difficulties that affect the progress of today's work. Now it is time to get off work, you feel exhausted physically and mentally, and at this time you need to give feedback to your superiors. situation, so you pick up your phone and say "Xiaoyi Xiaoyi, help me to report the results of today's work to my superiors".

Please click "start recording". Then read the following sentences:"Xiaoyi Xiaoyi, help me report the results of today's work to my superiors."[recording]

| ...... |
| --- |

**Xiaoyi's reply is as follows, please click to play and listen:**

[Embedded speech module:<https://www.bilibili.com/video/BV1zB4y1S7UK/>]

What is the gender of the smart voice assistant?


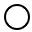
A. Male


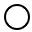
B. Female

How similar is the voice of an intelligent voice assistant to a human?


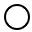
A. not at all similar


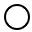
B. not similar

C. somewhat dissimilar

D. uncertain

E. somewhat similar

F. resemblance

G. very similar

The situation just now made me feel: [matrix scale]

| Dimension | Item | strongly disagree | rather disagree | a little disagree | uncertain | somewhat agree | relatively agree | Very much agree |
| --- | --- | --- | --- | --- | --- | --- | --- | --- |
| Perceived supervisor support | My superiors help me when I am in trouble |  |  |  |  |  |  |  |
| Perceived supervisor support | My superiors care about my goals and values |  |  |  |  |  |  |  |
| Perceived supervisor support | My superiors have little regard for my welfare (R) |  |  |  |  |  |  |  |
| Perceived supervisor support | My superiors care about my happiness |  |  |  |  |  |  |  |
|  | Please select this question"somewhat agree" |  |  |  |  |  |  |  |

The situation just now made me think: [matrix scale]

| dimension | item | strongly disagree | rather disagree | a little disagree | uncertain | somewhat agree | relatively agree | Very much agree |
| --- | --- | --- | --- | --- | --- | --- | --- | --- |
| self-efficacy | I believe I can analyze long-term problems and find solutions |  |  |  |  |  |  |  |
| self-efficacy | When meeting with management, I am confident in stating things within my scope of work |  |  |  |  |  |  |  |
| self-efficacy | I believe I have contributed to discussions of company strategy |  |  |  |  |  |  |  |
| self-efficacy | Within the scope of my work, I believe that I can accomplish my goals |  |  |  |  |  |  |  |
| self-efficacy | I believe I can connect with people outside the company (eg, suppliers, customers) and discuss issues |  |  |  |  |  |  |  |
| self-efficacy | I believe I can present information to a group of colleagues |  |  |  |  |  |  |  |
| hope | If I find myself stuck at work, I can think of many ways to get out |  |  |  |  |  |  |  |
| hope | Currently, I am full of energy to accomplish my work goals |  |  |  |  |  |  |  |
|  | Please select "Very much agree" for this question |  |  |  |  |  |  |  |

The situation just now made me think: [matrix scale]

| dimension | item | strongly disagree | rather disagree | a little disagree | uncertain | somewhat agree | relatively agree | Very much agree |
| --- | --- | --- | --- | --- | --- | --- | --- | --- |
| hope | There are many solutions to any problem. |  |  |  |  |  |  |  |
| hope | Right now, I consider myself quite successful at work. |  |  |  |  |  |  |  |
| hope | I can think of many ways to achieve my current work goals. |  |  |  |  |  |  |  |
| hope | Currently, I am achieving the work goals I have set for myself. |  |  |  |  |  |  |  |
| toughness | When I encounter setbacks at work, it is difficult for me to recover from it and move on. (R) |  |  |  |  |  |  |  |
| toughness | At work, I try to solve the problems I encounter no matter what. |  |  |  |  |  |  |  |
| toughness | If I have to do it at work, it can be said that I can do it independently. |  |  |  |  |  |  |  |
| toughness | I'm usually comfortable with stress at work. |  |  |  |  |  |  |  |
|  | Please select "strongly disagree" for this question |  |  |  |  |  |  |  |

**Please click play again and listen to Xiaoyi's reply:**

[Embedded speech module: <https://www.bilibili.com/video/BV1zB4y1S7UK/>]

The situation just now made me think: [matrix scale]

| Dimension | Item | strongly disagree | rather disagree | a little disagree | uncertain | somewhat agree | relatively agree | Very much agree |
| --- | --- | --- | --- | --- | --- | --- | --- | --- |
| toughness | Because of the hardships I've been through in the past, I'm now able to get through difficult times at work |  |  |  |  |  |  |  |
| toughness | In my current job, I can handle a lot of things at the same time |  |  |  |  |  |  |  |
| optimism | At work, when things are uncertain, I usually expect the best |  |  |  |  |  |  |  |
| optimism | If something can go wrong, it will go wrong even if I work wisely (R) |  |  |  |  |  |  |  |
| optimism | For my own work, I always see the bright side of things |  |  |  |  |  |  |  |
| optimism | I'm optimistic no matter what happens in the future of my work |  |  |  |  |  |  |  |
| optimism | At my current job, things have never worked out the way I hoped (R) |  |  |  |  |  |  |  |
| optimism | At work, I always believe "Behind the darkness is light, don't be pessimistic" |  |  |  |  |  |  |  |
|  | Please select "uncertain" for this question |  |  |  |  |  |  |  |

The situation just now made me think: [matrix scale]

| Dimension | Item | strongly disagree | rather disagree | a little disagree | uncertain | somewhat agree | relatively agree | Very much agree |
| --- | --- | --- | --- | --- | --- | --- | --- | --- |
| happiness in life | Most aspects of my life are close to my ideals |  |  |  |  |  |  |  |
| happiness in life | my life is very interesting |  |  |  |  |  |  |  |
| happiness in life | most of the time, I have moments when I feel really happy |  |  |  |  |  |  |  |
| happiness in life | I am satisfied with my life |  |  |  |  |  |  |  |
| happiness in life | If there was an afterlife, I would hardly change my current lifestyle |  |  |  |  |  |  |  |
| happiness in life | my living situation is very good |  |  |  |  |  |  |  |
| happiness at work | my job is very interesting |  |  |  |  |  |  |  |
| happiness at work | Overall, I am generally very satisfied with the work I do |  |  |  |  |  |  |  |
| happiness at work | I always find a way to enrich my work |  |  |  |  |  |  |  |
|  | Please select "rather disagree" for this question |  |  |  |  |  |  |  |

The situation just now made me think: [matrix scale]

| Dimension | Item | strongly disagree | rather disagree | a little disagree | uncertain | somewhat agree | relatively agree | Very much agree |
| --- | --- | --- | --- | --- | --- | --- | --- | --- |
| happiness at work | I am basically satisfied with my specific work content |  |  |  |  |  |  |  |
| happiness at work | My work will be a meaningful experience for me |  |  |  |  |  |  |  |
| happiness at work | I am generally satisfied with the sense of accomplishment I have gained from my current job |  |  |  |  |  |  |  |
| psychological well-being | In general, I am sure of myself,and have confidence in yourself |  |  |  |  |  |  |  |
| psychological well-being | I can communicate deeply with others (family or friends, etc.),know each other |  |  |  |  |  |  |  |
| psychological well-being | I can handle many things in my daily life well |  |  |  |  |  |  |  |
| psychological well-being | I am willing to give and share my time with others |  |  |  |  |  |  |  |
| psychological well-being | I am good at flexible scheduling, to get all the work done |  |  |  |  |  |  |  |
| psychological well-being | As time goes by, I feel like I have grown a lot |  |  |  |  |  |  |  |
|  | Please select "a little disagree" for this question |  |  |  |  |  |  |  |

**Priming Materials (Group 1)-Section ends**

**Priming Materials (Second Set)-Section starts**

**Next, please read the following materials carefully:**

Suppose your company has created an intelligent voice assistant named Xiaoyi for employees. In addition to basic functions such as note taking and search, it can also help you communicate quickly with your superiors online. Next, please imagine that you are working very hard to do your job today, but there are some difficulties that affect the progress of today's work. Now it is time to get off work, you feel exhausted physically and mentally, and at this time you need to give feedback to your superiors. situation, so you pick up your phone and say "Xiaoyi Xiaoyi, help me to report the results of today's work to my superiors".

Please click "start recording". Then read the following sentences:"Xiaoyi Xiaoyi, help me report the results of today's work to my superiors."[recording]

| ...... |
| --- |

**Xiaoyi's reply is as follows, please click to play and listen:**

[Embedded speech module: <https://www.bilibili.com/video/BV1JA4y1d7uj/>]

What is the gender of the intelligent voice assistant?

A. Male

B. Female

How similar is the voice of an intelligent voice assistant to a human?

A. not at all similar

B. not similar

C. somewhat dissimilar

D. uncertain

E. somewhat similar

F. resemblance

G. very similar

The situation just now made me feel[matrix scale]

| Dimension | Item | strongly disagree | rather disagree | a little disagree | uncertain | somewhat agree | relatively agree | Very much agree |
| --- | --- | --- | --- | --- | --- | --- | --- | --- |
| Perceived supervisor support | My superiors help me when I am in trouble |  |  |  |  |  |  |  |
| Perceived supervisor support | My superiors care about my goals and values |  |  |  |  |  |  |  |
| Perceived supervisor support | My superiors have little regard for my welfare (R) |  |  |  |  |  |  |  |
| Perceived supervisor support | My superiors care about my happiness |  |  |  |  |  |  |  |
|  | Please select "somewhat agree" for this question |  |  |  |  |  |  |  |

The situation just now made me think: [matrix scale]

| Dimension | Item | strongly disagree | rather disagree | a little disagree | uncertain | somewhat agree | relatively agree | Very much agree |
| --- | --- | --- | --- | --- | --- | --- | --- | --- |
| self-efficacy | I believe I can analyze long-term problems and find solutions |  |  |  |  |  |  |  |
| self-efficacy | When meeting with management, I am confident in stating things within my scope of work |  |  |  |  |  |  |  |
| self-efficacy | I believe I have contributed to discussions of company strategy |  |  |  |  |  |  |  |
| self-efficacy | Within the scope of my work, I believe that I can accomplish my goals |  |  |  |  |  |  |  |
| self-efficacy | I believe I can connect with people outside the company (e.g., suppliers, customers) and discuss issues |  |  |  |  |  |  |  |
| self-efficacy | I believe I can present information to a group of colleagues |  |  |  |  |  |  |  |
| hope | If I find myself stuck at work, I can think of many ways to get out |  |  |  |  |  |  |  |
| hope | Currently, I am full of energy to accomplish my work goals |  |  |  |  |  |  |  |
|  | Please select "Very much agree" for this question |  |  |  |  |  |  |  |

The situation just now made me think: [matrix scale]

| Dimension | Item | strongly disagree | rather disagree | a little disagree | uncertain | somewhat agree | relatively agree | Very much agree |
| --- | --- | --- | --- | --- | --- | --- | --- | --- |
| hope | There are many solutions to any problem. |  |  |  |  |  |  |  |
| hope | Right now, I consider myself quite successful at work. |  |  |  |  |  |  |  |
| hope | I can think of many ways to achieve my current work goals. |  |  |  |  |  |  |  |
| hope | Currently, I am achieving the work goals I have set for myself. |  |  |  |  |  |  |  |
| toughness | When I encounter setbacks at work, it is difficult for me to recover from it and move on. (R) |  |  |  |  |  |  |  |
| toughness | At work, I try to solve the problems I encounter no matter what. |  |  |  |  |  |  |  |
| toughness | If I have to do it at work, it can be said that I can do it independently. |  |  |  |  |  |  |  |
| toughness | I'm usually comfortable with stress at work. |  |  |  |  |  |  |  |
|  | Please select "strongly disagree" for this question |  |  |  |  |  |  |  |

**Please click play again and listen to Xiaoyi's reply:**

[Embedded speech module: <https://www.bilibili.com/video/BV1JA4y1d7uj/>]

The situation just now made me think: [matrix scale]

| Dimension | Item | strongly disagree | rather disagree | a little disagree | uncertain | somewhat agree | relatively agree | Very much agree |
| --- | --- | --- | --- | --- | --- | --- | --- | --- |
| toughness | Because of the hardships I've been through in the past, I'm now able to get through difficult times at work |  |  |  |  |  |  |  |
| toughness | In my current job, I can handle a lot of things at the same time |  |  |  |  |  |  |  |
| optimism | At work, when things are uncertain, I usually expect the best |  |  |  |  |  |  |  |
| optimism | If something can go wrong, it will go wrong even if I work wisely (R) |  |  |  |  |  |  |  |
| optimism | For my own work, I always see the bright side of things |  |  |  |  |  |  |  |
| optimism | I'm optimistic no matter what happens in the future of my work |  |  |  |  |  |  |  |
| optimism | At my current job, things have never worked out the way I hoped (R) |  |  |  |  |  |  |  |
| optimism | At work, I always believe "Behind the darkness is light, don't be pessimistic" |  |  |  |  |  |  |  |
|  | Please select "uncertain" for this question |  |  |  |  |  |  |  |

The situation just now made me think: [matrix scale]

| Dimension | Item | strongly disagree | rather disagree | a little disagree | uncertain | somewhat agree | relatively agree | Very much agree |
| --- | --- | --- | --- | --- | --- | --- | --- | --- |
| happiness in life | Most aspects of my life are close to my ideals |  |  |  |  |  |  |  |
| happiness in life | my life is very interesting |  |  |  |  |  |  |  |
| happiness in life | most of the time, I have moments when I feel really happy |  |  |  |  |  |  |  |
| happiness in life | I am satisfied with my life |  |  |  |  |  |  |  |
| happiness in life | If there was an afterlife, I would hardly change my current lifestyle |  |  |  |  |  |  |  |
| happiness in life | my living situation is very good |  |  |  |  |  |  |  |
| happiness at work | my job is very interesting |  |  |  |  |  |  |  |
| happiness at work | Overall, I am generally very satisfied with the work I do |  |  |  |  |  |  |  |
| happiness at work | I always find a way to enrich my work |  |  |  |  |  |  |  |
|  | Please select "rather disagree" for this question |  |  |  |  |  |  |  |

The situation just now made me think:[matrix scale]

| Dimension | Item | strongly disagree | rather disagree | a little disagree | uncertain | somewhat agree | relatively agree | Very much agree |
| --- | --- | --- | --- | --- | --- | --- | --- | --- |
| happiness at work | I am basically satisfied with my specific work content |  |  |  |  |  |  |  |
| happiness at work | My work will be a meaningful experience for me |  |  |  |  |  |  |  |
| happiness at work | I am generally satisfied with the sense of accomplishment I have gained from my current job |  |  |  |  |  |  |  |
| psychological well-being | In general, I am sure of myself, and have confidence in yourself |  |  |  |  |  |  |  |
| psychological well-being | I can communicate deeply with others (family or friends, etc.), know each other |  |  |  |  |  |  |  |
| psychological well-being | I can handle many things in my daily life well |  |  |  |  |  |  |  |
| psychological well-being | I am willing to give and share my time with others |  |  |  |  |  |  |  |
| psychological well-being | I am good at flexible scheduling, to get all the work done |  |  |  |  |  |  |  |
| psychological well-being | As time goes by, I feel like I have grown a lot |  |  |  |  |  |  |  |
|  | Please select "a little disagree" for this question |  |  |  |  |  |  |  |

**Priming Materials (Second Set)-Section ends**

**Starting Materials (Group 3)-Section starts**

**Next, please read the following materials carefully:**

Suppose your company has created an intelligent voice assistant named Xiaoyi for employees. In addition to basic functions such as note taking and search, it can also help you communicate quickly with your superiors online. Next, please imagine that you are working very hard to do your job today, but there are some difficulties that affect the progress of today's work. Now it is time to get off work, you feel exhausted physically and mentally, and at this time you need to give feedback to your superiors. situation, so you pick up your phone and say"Xiaoyi Xiaoyi, help me to report the results of today's work to my superiors".

Please click "start recording". Then read the following sentences:"Xiaoyi Xiaoyi, help me report the results of today's work to my superiors."[recording]

| ...... |
| --- |

**Xiaoyi's reply is as follows, please click to play and listen:**

[Embedded speech module: <https://www.bilibili.com/video/BV1LA4y1d7mZ/>]

What is the gender of the smart voice assistant?

A. Male

B. Female

How similar is the voice of an intelligent voice assistant to a human?

A. not at all similar

B. not similar

C. somewhat dissimilar

D. uncertain

E. somewhat similar

F. resemblance

G. very similar

The situation just now made me feel[matrix scale]

| Dimension | Item | strongly disagree | rather disagree | a little disagree | uncertain | somewhat agree | relatively agree | Very much agree |
| --- | --- | --- | --- | --- | --- | --- | --- | --- |
| Perceived supervisor support | My superiors help me when I am in trouble |  |  |  |  |  |  |  |
| Perceived supervisor support | My superiors care about my goals and values |  |  |  |  |  |  |  |
| Perceived supervisor support | My superiors have little regard for my welfare (R) |  |  |  |  |  |  |  |
| Perceived supervisor support | My superiors care about my happiness |  |  |  |  |  |  |  |
|  | Please select "somewhat agree" for this question |  |  |  |  |  |  |  |

The situation just now made me think:[matrix scale]

| Dimension | Item | strongly disagree | rather disagree | a little disagree | uncertain | somewhat agree | relatively agree | Very much agree |
| --- | --- | --- | --- | --- | --- | --- | --- | --- |
| self-efficacy | I believe I can analyze long-term problems and find solutions |  |  |  |  |  |  |  |
| self-efficacy | When meeting with management, I am confident in stating things within my scope of work |  |  |  |  |  |  |  |
| self-efficacy | I believe I have contributed to discussions of company strategy |  |  |  |  |  |  |  |
| self-efficacy | Within the scope of my work, I believe that I can accomplish my goals |  |  |  |  |  |  |  |
| self-efficacy | I believe I can connect with people outside the company (e.g., suppliers, customers) and discuss issues |  |  |  |  |  |  |  |
| self-efficacy | I believe I can present information to a group of colleagues |  |  |  |  |  |  |  |
| hope | If I find myself stuck at work, I can think of many ways to get out |  |  |  |  |  |  |  |
| hope | Currently, I am full of energy to accomplish my work goals |  |  |  |  |  |  |  |
|  | Please select "Very much agree" for this question |  |  |  |  |  |  |  |

The situation just now made me think: [matrix scale]

| Dimension | Item | strongly disagree | rather disagree | a little disagree | uncertain | somewhat agree | relatively agree | Very much agree |
| --- | --- | --- | --- | --- | --- | --- | --- | --- |
| hope | There are many solutions to any problem. |  |  |  |  |  |  |  |
| hope | Right now, I consider myself quite successful at work. |  |  |  |  |  |  |  |
| hope | I can think of many ways to achieve my current work goals. |  |  |  |  |  |  |  |
| hope | Currently, I am achieving the work goals I have set for myself. |  |  |  |  |  |  |  |
| toughness | When I encounter setbacks at work, it is difficult for me to recover from it and move on. (R) |  |  |  |  |  |  |  |
| toughness | At work, I try to solve the problems I encounter no matter what. |  |  |  |  |  |  |  |
| toughness | If I have to do it at work, it can be said that I can do it independently. |  |  |  |  |  |  |  |
| toughness | I'm usually comfortable with stress at work. |  |  |  |  |  |  |  |
|  | Please select "strongly disagree" for this question |  |  |  |  |  |  |  |

**Please click play again and listen to Xiaoyi's reply:**

[Embedded speech module: <https://www.bilibili.com/video/BV1LA4y1d7mZ/>]

The situation just now made me think:[matrix scale]

| Dimension | Item | strongly disagree | rather disagree | a little disagree | uncertain | somewhat agree | relatively agree | Very much agree |
| --- | --- | --- | --- | --- | --- | --- | --- | --- |
| toughness | Because of the hardships I've been through in the past, I'm now able to get through difficult times at work |  |  |  |  |  |  |  |
| toughness | In my current job, I can handle a lot of things at the same time |  |  |  |  |  |  |  |
| optimism | At work, when things are uncertain, I usually expect the best |  |  |  |  |  |  |  |
| optimism | If something can go wrong, it will go wrong even if I work wisely (R) |  |  |  |  |  |  |  |
| optimism | For my own work, I always see the bright side of things |  |  |  |  |  |  |  |
| optimism | I'm optimistic no matter what happens in the future of my work |  |  |  |  |  |  |  |
| optimism | At my current job, things have never worked out the way I hoped (R) |  |  |  |  |  |  |  |
| optimism | At work, I always believe "Behind the darkness is light, don't be pessimistic" |  |  |  |  |  |  |  |
|  | Please select "uncertain" for this question |  |  |  |  |  |  |  |

The situation just now made me think: [matrix scale]

| Dimension | Item | strongly disagree | rather disagree | a little disagree | uncertain | somewhat agree | relatively agree | Very much agree |
| --- | --- | --- | --- | --- | --- | --- | --- | --- |
| happiness in life | Most aspects of my life are close to my ideals |  |  |  |  |  |  |  |
| happiness in life | my life is very interesting |  |  |  |  |  |  |  |
| happiness in life | most of the time, I have moments when I feel really happy |  |  |  |  |  |  |  |
| happiness in life | I am satisfied with my life |  |  |  |  |  |  |  |
| happiness in life | If there was an afterlife, I would hardly change my current lifestyle |  |  |  |  |  |  |  |
| happiness in life | my living situation is very good |  |  |  |  |  |  |  |
| happiness at work | my job is very interesting |  |  |  |  |  |  |  |
| happiness at work | Overall, I am generally very satisfied with the work I do |  |  |  |  |  |  |  |
| happiness at work | I always find a way to enrich my work |  |  |  |  |  |  |  |
|  | Please select "rather disagree" for this question |  |  |  |  |  |  |  |

The situation just now made me think: [matrix scale]

| dimension | item | strongly disagree | rather disagree | a little disagree | uncertain | somewhat agree | relatively agree | Very much agree |
| --- | --- | --- | --- | --- | --- | --- | --- | --- |
| happiness at work | I am basically satisfied with my specific work content |  |  |  |  |  |  |  |
| happiness at work | My work will be a meaningful experience for me |  |  |  |  |  |  |  |
| happiness at work | I am generally satisfied with the sense of accomplishment I have gained from my current job |  |  |  |  |  |  |  |
| psychological well-being | In general, I am sure of myself, and have confidence in yourself |  |  |  |  |  |  |  |
| psychological well-being | I can communicate deeply with others (family or friends, etc.),know each other |  |  |  |  |  |  |  |
| psychological well-being | I can handle many things in my daily life well |  |  |  |  |  |  |  |
| psychological well-being | I am willing to give and share my time with others |  |  |  |  |  |  |  |
| psychological well-being | I am good at flexible scheduling, to get all the work done |  |  |  |  |  |  |  |
| psychological well-being | As time goes by, I feel like I have grown a lot |  |  |  |  |  |  |  |
|  | Please select "a little disagree" for this question |  |  |  |  |  |  |  |

**Starting Materials (Group 3)-Section ends**

**Starting Materials (Group 4)-Section starts**

**Next, please read the following materials carefully:**

Suppose your company has created an intelligent voice assistant named Xiaoyi for employees. In addition to basic functions such as note taking and search, it can also help you communicate quickly with your superiors online. Next, please imagine that you are working very hard to do your job today, but there are some difficulties that affect the progress of today's work. Now it is time to get off work, you feel exhausted physically and mentally, and at this time you need to give feedback to your superiors. situation, so you pick up your phone and say"Xiaoyi Xiaoyi, help me to report the results of today's work to my superiors".

Please click "start recording". Then read the following sentences:"Xiaoyi Xiaoyi, help me report the results of today's work to my superiors."[recording]

| ...... |
| --- |

**Xiaoyi's reply is as follows, please click to play and listen:**

[Embedded speech module: <https://www.bilibili.com/video/BV1vZ4y1q7qX/>]

What is the gender of the smart voice assistant?

A. Male

B. Female

How similar is the voice of an intelligent voice assistant to a human?

A. not at all similar

B. not similar

C. somewhat dissimilar

D. uncertain

E. somewhat similar

F. resemblance

G. very similar

The situation just now made me feel[matrix scale]

| Dimension | Item | strongly disagree | rather disagree | a little disagree | uncertain | somewhat agree | relatively agree | Very much agree |
| --- | --- | --- | --- | --- | --- | --- | --- | --- |
| Perceived supervisor support | My superiors help me when I am in trouble |  |  |  |  |  |  |  |
| Perceived supervisor support | My superiors care about my goals and values |  |  |  |  |  |  |  |
| Perceived supervisor support | My superiors have little regard for my welfare (R) |  |  |  |  |  |  |  |
| Perceived supervisor support | My superiors care about my happiness |  |  |  |  |  |  |  |
|  | Please select "somewhat agree" for this question |  |  |  |  |  |  |  |

The situation just now made me think:[matrix scale]

| Dimension | Item | strongly disagree | rather disagree | a little disagree | uncertain | somewhat agree | relatively agree | Very much agree |
| --- | --- | --- | --- | --- | --- | --- | --- | --- |
| self-efficacy | I believe I can analyze long-term problems and find solutions |  |  |  |  |  |  |  |
| self-efficacy | When meeting with management, I am confident in stating things within my scope of work |  |  |  |  |  |  |  |
| self-efficacy | I believe I have contributed to discussions of company strategy |  |  |  |  |  |  |  |
| self-efficacy | Within the scope of my work, I believe that I can accomplish my goals |  |  |  |  |  |  |  |
| self-efficacy | I believe I can connect with people outside the company (eg, suppliers, customers) and discuss issues |  |  |  |  |  |  |  |
| self-efficacy | I believe I can present information to a group of colleagues |  |  |  |  |  |  |  |
| hope | If I find myself stuck at work, I can think of many ways to get out |  |  |  |  |  |  |  |
| hope | Currently, I am full of energy to accomplish my work goals |  |  |  |  |  |  |  |
|  | Please select "Very much agree" for this question |  |  |  |  |  |  |  |

The situation just now made me think:[matrix scale]

| Dimension | Item | strongly disagree | rather disagree | a little disagree | uncertain | somewhat agree | relatively agree | Very much agree |
| --- | --- | --- | --- | --- | --- | --- | --- | --- |
| hope | There are many solutions to any problem. |  |  |  |  |  |  |  |
| hope | Right now, I consider myself quite successful at work. |  |  |  |  |  |  |  |
| hope | I can think of many ways to achieve my current work goals. |  |  |  |  |  |  |  |
| hope | Currently, I am achieving the work goals I have set for myself. |  |  |  |  |  |  |  |
| toughness | When I encounter setbacks at work, it is difficult for me to recover from it and move on. (R) |  |  |  |  |  |  |  |
| toughness | At work, I try to solve the problems I encounter no matter what. |  |  |  |  |  |  |  |
| toughness | If I have to do it at work, it can be said that I can do it independently. |  |  |  |  |  |  |  |
| toughness | I'm usually comfortable with stress at work. |  |  |  |  |  |  |  |
|  | Please select "strongly disagree" for this question |  |  |  |  |  |  |  |

**Please click play again and listen to Xiaoyi's reply:**

[Embedded speech module: <https://www.bilibili.com/video/BV1vZ4y1q7qX/>]

The situation just now made me think:[matrix scale]

| Dimension | Item | strongly disagree | rather disagree | a little disagree | uncertain | somewhat agree | relatively agree | Very much agree |
| --- | --- | --- | --- | --- | --- | --- | --- | --- |
| toughness | Because of the hardships I've been through in the past, I'm now able to get through difficult times at work |  |  |  |  |  |  |  |
| toughness | In my current job, I can handle a lot of things at the same time |  |  |  |  |  |  |  |
| optimism | At work, when things are uncertain, I usually expect the best |  |  |  |  |  |  |  |
| optimism | If something can go wrong, it will go wrong even if I work wisely (R) |  |  |  |  |  |  |  |
| optimism | For my own work, I always see the bright side of things |  |  |  |  |  |  |  |
| optimism | I'm optimistic no matter what happens in the future of my work |  |  |  |  |  |  |  |
| optimism | At my current job, things have never worked out the way I hoped (R) |  |  |  |  |  |  |  |
| optimism | At work, I always believe "Behind the darkness is light, don't be pessimistic" |  |  |  |  |  |  |  |
|  | Please select "uncertain" for this question |  |  |  |  |  |  |  |

The situation just now made me think: [matrix scale]

| Dimension | Item | strongly disagree | rather disagree | a little disagree | uncertain | somewhat agree | relatively agree | Very much agree |
| --- | --- | --- | --- | --- | --- | --- | --- | --- |
| happiness in life | Most aspects of my life are close to my ideals |  |  |  |  |  |  |  |
| happiness in life | my life is very interesting |  |  |  |  |  |  |  |
| happiness in life | most of the time, I have moments when I feel really happy |  |  |  |  |  |  |  |
| happiness in life | I am satisfied with my life |  |  |  |  |  |  |  |
| happiness in life | If there was an afterlife, I would hardly change my current lifestyle |  |  |  |  |  |  |  |
| happiness in life | my living situation is very good |  |  |  |  |  |  |  |
| happiness at work | my job is very interesting |  |  |  |  |  |  |  |
| happiness at work | Overall, I am generally very satisfied with the work I do |  |  |  |  |  |  |  |
| happiness at work | I always find a way to enrich my work |  |  |  |  |  |  |  |
|  | Please select "rather disagree" for this question |  |  |  |  |  |  |  |

The situation just now made me think: [matrix scale]

| Dimension | Item | strongly disagree | rather disagree | a little disagree | uncertain | somewhat agree | relatively agree | Very much agree |
| --- | --- | --- | --- | --- | --- | --- | --- | --- |
| happiness at work | I am basically satisfied with my specific work content |  |  |  |  |  |  |  |
| happiness at work | My work will be a meaningful experience for me |  |  |  |  |  |  |  |
| happiness at work | I am generally satisfied with the sense of accomplishment I have gained from my current job |  |  |  |  |  |  |  |
| psychological well-being | In general, I am sure of myself, and have confidence in yourself |  |  |  |  |  |  |  |
| psychological well-being | I can communicate deeply with others (family or friends, etc.),know each other |  |  |  |  |  |  |  |
| psychological well-being | I can handle many things in my daily life well |  |  |  |  |  |  |  |
| psychological well-being | I am willing to give and share my time with others |  |  |  |  |  |  |  |
| psychological well-being | I am good at flexible scheduling, to get all the work done |  |  |  |  |  |  |  |
| psychological well-being | As time goes by, I feel like I have grown a lot |  |  |  |  |  |  |  |
|  | Please select "a little disagree" for this question |  |  |  |  |  |  |  |

**Starting Materials (Group 4)-Section ends**

**Starting Materials (Group 5)-Section starts**

**Next, please read the following materials carefully:**

Suppose your company has created an intelligent voice assistant named Xiaoyi for employees. In addition to basic functions such as note taking and search, it can also help you communicate quickly with your superiors online. Next, please imagine that you are working very hard to do your job today, but there are some difficulties that affect the progress of today's work. Now it is time to get off work, you feel exhausted physically and mentally, and at this time you need to give feedback to your superiors. situation, so you pick up your phone and say "Xiaoyi Xiaoyi, help me to report the results of today's work to my superiors".

Please click "start recording". Then read the following sentences:"Xiaoyi Xiaoyi, help me report the results of today's work to my superiors."[recording]

| ...... |
| --- |

**Xiaoyi's reply is as follows, please check:**

"Hi, I'm Xiao Yi. It's been a busy day. I've sent your summary of today's work to your superiors. The superior sent feedback saying that the work summary you submitted has shown a relatively complete work result. As you can see, you are one step closer to reaching your goal! I'm already looking for experts to consult on those work problems, now enjoy your leisure time."

The situation just now made me feel[matrix scale]

| Dimension | Item | strongly disagree | rather disagree | a little disagree | uncertain | somewhat agree | relatively agree | Very much agree |
| --- | --- | --- | --- | --- | --- | --- | --- | --- |
| Perceived supervisor support | My superiors help me when I am in trouble |  |  |  |  |  |  |  |
| Perceived supervisor support | My superiors care about my goals and values |  |  |  |  |  |  |  |
| Perceived supervisor support | My superiors have little regard for my welfare (R) |  |  |  |  |  |  |  |
| Perceived supervisor support | My superiors care about my happiness |  |  |  |  |  |  |  |
|  | Please select "somewhat agree" for this question |  |  |  |  |  |  |  |

The situation just now made me think: [matrix scale]

| Dimension | Item | strongly disagree | rather disagree | a little disagree | uncertain | somewhat agree | relatively agree | Very much agree |
| --- | --- | --- | --- | --- | --- | --- | --- | --- |
| self-efficacy | I believe I can analyze long-term problems and find solutions |  |  |  |  |  |  |  |
| self-efficacy | When meeting with management, I am confident in stating things within my scope of work |  |  |  |  |  |  |  |
| self-efficacy | I believe I have contributed to discussions of company strategy |  |  |  |  |  |  |  |
| self-efficacy | Within the scope of my work, I believe that I can accomplish my goals |  |  |  |  |  |  |  |
| self-efficacy | I believe I can connect with people outside the company (e.g., suppliers, customers) and discuss issues |  |  |  |  |  |  |  |
| self-efficacy | I believe I can present information to a group of colleagues |  |  |  |  |  |  |  |
| hope | If I find myself stuck at work, I can think of many ways to get out |  |  |  |  |  |  |  |
| hope | Currently, I am full of energy to accomplish my work goals |  |  |  |  |  |  |  |
|  | Please select "Very much agree" for this question |  |  |  |  |  |  |  |

The situation just now made me think: [matrix scale]

| Dimension | Item | strongly disagree | rather disagree | a little disagree | uncertain | somewhat agree | relatively agree | Very much agree |
| --- | --- | --- | --- | --- | --- | --- | --- | --- |
| hope | There are many solutions to any problem. |  |  |  |  |  |  |  |
| hope | Right now, I consider myself quite successful at work. |  |  |  |  |  |  |  |
| hope | I can think of many ways to achieve my current work goals. |  |  |  |  |  |  |  |
| hope | Currently, I am achieving the work goals I have set for myself. |  |  |  |  |  |  |  |
| toughness | When I encounter setbacks at work, it is difficult for me to recover from it and move on. (R) |  |  |  |  |  |  |  |
| toughness | At work, I try to solve the problems I encounter no matter what. |  |  |  |  |  |  |  |
| toughness | If I have to do it at work, it can be said that I can do it independently. |  |  |  |  |  |  |  |
| toughness | I'm usually comfortable with stress at work. |  |  |  |  |  |  |  |
|  | Please select "strongly disagree" for this question |  |  |  |  |  |  |  |

**Please check Xiaoyi's reply again:**

"Hi, I'm Xiao Yi. It's been a busy day. I've sent your summary of today's work to your superiors. The superior sent feedback saying that the work summary you submitted has shown a relatively complete work result. As you can see, you are one step closer to reaching your goal! I'm already looking for experts to consult on those work problems, now enjoy your leisure time."

The situation just now made me think: [matrix scale]

| Dimension | Item | strongly disagree | rather disagree | a little disagree | uncertain | somewhat agree | relatively agree | Very much agree |
| --- | --- | --- | --- | --- | --- | --- | --- | --- |
| toughness | Because of the hardships I've been through in the past, I'm now able to get through difficult times at work |  |  |  |  |  |  |  |
| toughness | In my current job, I can handle a lot of things at the same time |  |  |  |  |  |  |  |
| optimism | At work, when things are uncertain, I usually expect the best |  |  |  |  |  |  |  |
| optimism | If something can go wrong, it will go wrong even if I work wisely (R) |  |  |  |  |  |  |  |
| optimism | For my own work, I always see the bright side of things |  |  |  |  |  |  |  |
| optimism | I'm optimistic no matter what happens in the future of my work |  |  |  |  |  |  |  |
| optimism | At my current job, things have never worked out the way I hoped (R) |  |  |  |  |  |  |  |
| optimism | At work, I always believe "Behind the darkness is light, don't be pessimistic" |  |  |  |  |  |  |  |
|  | Please select "uncertain" for this question |  |  |  |  |  |  |  |

The situation just now made me think: [matrix scale]

| Dimension | Item | strongly disagree | rather disagree | a little disagree | uncertain | somewhat agree | relatively agree | Very much agree |
| --- | --- | --- | --- | --- | --- | --- | --- | --- |
| happiness in life | Most aspects of my life are close to my ideals |  |  |  |  |  |  |  |
| happiness in life | my life is very interesting |  |  |  |  |  |  |  |
| happiness in life | most of the time, I have moments when I feel really happy |  |  |  |  |  |  |  |
| happiness in life | I am satisfied with my life |  |  |  |  |  |  |  |
| happiness in life | If there was an afterlife, I would hardly change my current lifestyle |  |  |  |  |  |  |  |
| happiness in life | my living situation is very good |  |  |  |  |  |  |  |
| happiness at work | my job is very interesting |  |  |  |  |  |  |  |
| happiness at work | Overall, I am generally very satisfied with the work I do |  |  |  |  |  |  |  |
| happiness at work | I always find a way to enrich my work |  |  |  |  |  |  |  |
|  | Please select "rather disagree" for this question |  |  |  |  |  |  |  |

The situation just now made me think: [matrix scale]

| Dimension | Item | strongly disagree | rather disagree | a little disagree | uncertain | somewhat agree | relatively agree | Very much agree |
| --- | --- | --- | --- | --- | --- | --- | --- | --- |
| happiness at work | I am basically satisfied with my specific work content |  |  |  |  |  |  |  |
| happiness at work | My work will be a meaningful experience for me |  |  |  |  |  |  |  |
| happiness at work | I am generally satisfied with the sense of accomplishment I have gained from my current job |  |  |  |  |  |  |  |
| psychological well-being | In general, I am sure of myself, and have confidence in yourself |  |  |  |  |  |  |  |
| psychological well-being | I can communicate deeply with others (family or friends, etc.),know each other |  |  |  |  |  |  |  |
| psychological well-being | I can handle many things in my daily life well |  |  |  |  |  |  |  |
| psychological well-being | I am willing to give and share my time with others |  |  |  |  |  |  |  |
| psychological well-being | I am good at flexible scheduling, to get all the work done |  |  |  |  |  |  |  |
| psychological well-being | As time goes by,I feel like I have grown a lot |  |  |  |  |  |  |  |
|  | Please select "a little disagree" for this question |  |  |  |  |  |  |  |

**Starting Materials (Group 5)-Section ends**

**Starting Materials (Group VI)-Section starts**

**Next, please read the following materials carefully:**

Please imagine that you are working very hard to do your work today, but some difficulties have affected the progress of today's work. Now it is time to get off work, you feel exhausted physically and mentally, and at this time you need to report your work situation with your superiors, So you pick up your phone and get lost in thought.

The situation just now made me feel[matrix scale]

| Dimension | Item | strongly disagree | rather disagree | a little disagree | uncertain | somewhat agree | relatively agree | Very much agree |
| --- | --- | --- | --- | --- | --- | --- | --- | --- |
| Perceived supervisor support | My superiors help me when I am in trouble |  |  |  |  |  |  |  |
| Perceived supervisor support | My superiors care about my goals and values |  |  |  |  |  |  |  |
| Perceived supervisor support | My superiors have little regard for my welfare (R) |  |  |  |  |  |  |  |
| Perceived supervisor support | My superiors care about my happiness |  |  |  |  |  |  |  |
|  | Please select "somewhat agree" for this question |  |  |  |  |  |  |  |

The situation just now made me think:[matrix scale]

| Dimension | Item | strongly disagree | rather disagree | a little disagree | uncertain | somewhat agree | relatively agree | Very much agree |
| --- | --- | --- | --- | --- | --- | --- | --- | --- |
| self-efficacy | I believe I can analyze long-term problems and find solutions |  |  |  |  |  |  |  |
| self-efficacy | When meeting with management, I am confident in stating things within my scope of work |  |  |  |  |  |  |  |
| self-efficacy | I believe I have contributed to discussions of company strategy |  |  |  |  |  |  |  |
| self-efficacy | Within the scope of my work, I believe that I can accomplish my goals |  |  |  |  |  |  |  |
| self-efficacy | I believe I can connect with people outside the company (e.g., suppliers, customers) and discuss issues |  |  |  |  |  |  |  |
| self-efficacy | I believe I can present information to a group of colleagues |  |  |  |  |  |  |  |
| hope | If I find myself stuck at work, I can think of many ways to get out |  |  |  |  |  |  |  |
| hope | Currently, I am full of energy to accomplish my work goals |  |  |  |  |  |  |  |
|  | Please select "Very much agree" fir this question |  |  |  |  |  |  |  |

The situation just now made me think: [matrix scale]

| Dimension | Item | strongly disagree | rather disagree | a little disagree | uncertain | somewhat agree | relatively agree | Very much agree |
| --- | --- | --- | --- | --- | --- | --- | --- | --- |
| hope | There are many solutions to any problem. |  |  |  |  |  |  |  |
| hope | Right now, I consider myself quite successful at work. |  |  |  |  |  |  |  |
| hope | I can think of many ways to achieve my current work goals. |  |  |  |  |  |  |  |
| hope | Currently, I am achieving the work goals I have set for myself. |  |  |  |  |  |  |  |
| toughness | When I encounter setbacks at work, it is difficult for me to recover from it and move on. (R) |  |  |  |  |  |  |  |
| toughness | At work, I try to solve the problems I encounter no matter what. |  |  |  |  |  |  |  |
| toughness | If I have to do it at work, it can be said that I can do it independently. |  |  |  |  |  |  |  |
| toughness | I'm usually comfortable with stress at work. |  |  |  |  |  |  |  |
|  | Please select "strongly disagree" for this question |  |  |  |  |  |  |  |

**Please review the material again:**

Please imagine that you are working very hard to do your work today, but some difficulties have affected the progress of today's work. Now it is time to get off work, you feel exhausted physically and mentally, and at this time you need to report your work situation with your superiors, So you pick up your phone and get lost in thought.

The situation just now made me think:[matrix scale]

| Dimension | Item | strongly disagree | rather disagree | a little disagree | uncertain | somewhat agree | relatively agree | Very much agree |
| --- | --- | --- | --- | --- | --- | --- | --- | --- |
| toughness | Because of the hardships I've been through in the past, I'm now able to get through difficult times at work |  |  |  |  |  |  |  |
| toughness | In my current job, I can handle a lot of things at the same time |  |  |  |  |  |  |  |
| optimism | At work, when things are uncertain, I usually expect the best |  |  |  |  |  |  |  |
| optimism | If something can go wrong, it will go wrong even if I work wisely (R) |  |  |  |  |  |  |  |
| optimism | For my own work, I always see the bright side of things |  |  |  |  |  |  |  |
| optimism | I'm optimistic no matter what happens in the future of my work |  |  |  |  |  |  |  |
| optimism | At my current job, things have never worked out the way I hoped (R) |  |  |  |  |  |  |  |
| optimism | At work, I always believe "Behind the darkness is light, don't be pessimistic" |  |  |  |  |  |  |  |
|  | Please select "uncertain" for this question |  |  |  |  |  |  |  |

The situation just now made me think:[matrix scale]

| Dimension | Item | strongly disagree | rather disagree | a little disagree | uncertain | somewhat agree | relatively agree | Very much agree |
| --- | --- | --- | --- | --- | --- | --- | --- | --- |
| happiness in life | Most aspects of my life are close to my ideals |  |  |  |  |  |  |  |
| happiness in life | my life is very interesting |  |  |  |  |  |  |  |
| happiness in life | most of the time, I have moments when I feel really happy |  |  |  |  |  |  |  |
| happiness in life | I am satisfied with my life |  |  |  |  |  |  |  |
| happiness in life | If there was an afterlife, I would hardly change my current lifestyle |  |  |  |  |  |  |  |
| happiness in life | my living situation is very good |  |  |  |  |  |  |  |
| happiness at work | my job is very interesting |  |  |  |  |  |  |  |
| happiness at work | Overall, I am generally very satisfied with the work I do |  |  |  |  |  |  |  |
| happiness at work | I always find a way to enrich my work |  |  |  |  |  |  |  |
|  | Please select "rather disagree" for this question |  |  |  |  |  |  |  |

The situation just now made me think:[matrix scale]

| Dimension | Item | strongly disagree | rather disagree | a little disagree | uncertain | somewhat agree | relatively agree | Very much agree |
| --- | --- | --- | --- | --- | --- | --- | --- | --- |
| happiness at work | I am basically satisfied with my specific work content |  |  |  |  |  |  |  |
| happiness at work | My work will be a meaningful experience for me |  |  |  |  |  |  |  |
| happiness at work | I am generally satisfied with the sense of accomplishment I have gained from my current job |  |  |  |  |  |  |  |
| psychological well-being | In general, I am sure of myself, and have confidence in yourself |  |  |  |  |  |  |  |
| psychological well-being | I can communicate deeply with others (family or friends, etc.),know each other |  |  |  |  |  |  |  |
| psychological well-being | I can handle many things in my daily life well |  |  |  |  |  |  |  |
| psychological well-being | I am willing to give and share my time with others |  |  |  |  |  |  |  |
| psychological well-being | I am good at flexible scheduling, to get all the work done |  |  |  |  |  |  |  |
| psychological well-being | As time goes by, I feel like I have grown a lot |  |  |  |  |  |  |  |
|  | Please select "a little disagree" for this question |  |  |  |  |  |  |  |

**Starting Materials (Group VI)-Section ends**

**qualitative interview-Section starts**

Could you please recall a recent problem that you have encountered at work with your leader or an incident that required intelligent voice assistance? (please input by voice)[recording]

| ...... |
| --- |

May I ask what you think the intelligent voice assistant does or provides that can give you emotional support? (e.g. make you feel like the leader cares about you)[recording]

| ...... |
| --- |
